# Supplementary material
Source: PubMed Central journal article supplement (PMC7007772)
Supplement: NIHMS1551050-supplement-1.pdf [file NIHMS1551050-supplement-1.pdf]

Online supplemental table. Seizure severity among 11 children with epilepsy one year after pediatric stroke. Severity was measured by remote seizure (> 7 days after stroke) frequency over the year and anti-convulsant treatment.

| Age at stroke | Remote Seizure |                                                                   | Anti-convulsants |         |
|---------------|----------------|-------------------------------------------------------------------|------------------|---------|
|               | Count          | Description                                                       | Tried            | Ongoing |
| Neonatal      | 1              | epilepsy type not classified                                      | 2                | 1       |
| Neonatal      | 1              | epilepsy type not classified                                      | 2                | 1       |
| Neonatal      | 3              | focal epilepsy                                                    | 4                | 2       |
| 2 months      | 1              | focal epilepsy                                                    | 1                | 1       |
| 3 months      | ≥100           | focal epilepsy                                                    | 6                | 3       |
| 4 months      | 6              | epilepsy type not classified                                      | 1                | 1       |
| 13 months     | ≥100           | epileptic encephalopathy                                          | 3                | 2       |
| 17 months     | ≥100           | independent multifocal and generalized<br>electrographic seizures | 2                | 1       |
| 47 months     | 1              | epilepsy type not classified                                      | 2                | 1       |
| 48 months     | 2              | focal epilepsy                                                    | 1                | 1       |
| 52 months     | 9              | generalized epilepsy                                              | 2                | 2       |
