# Supplementary material
Source: PubMed Central journal article supplement (PMC7007772)

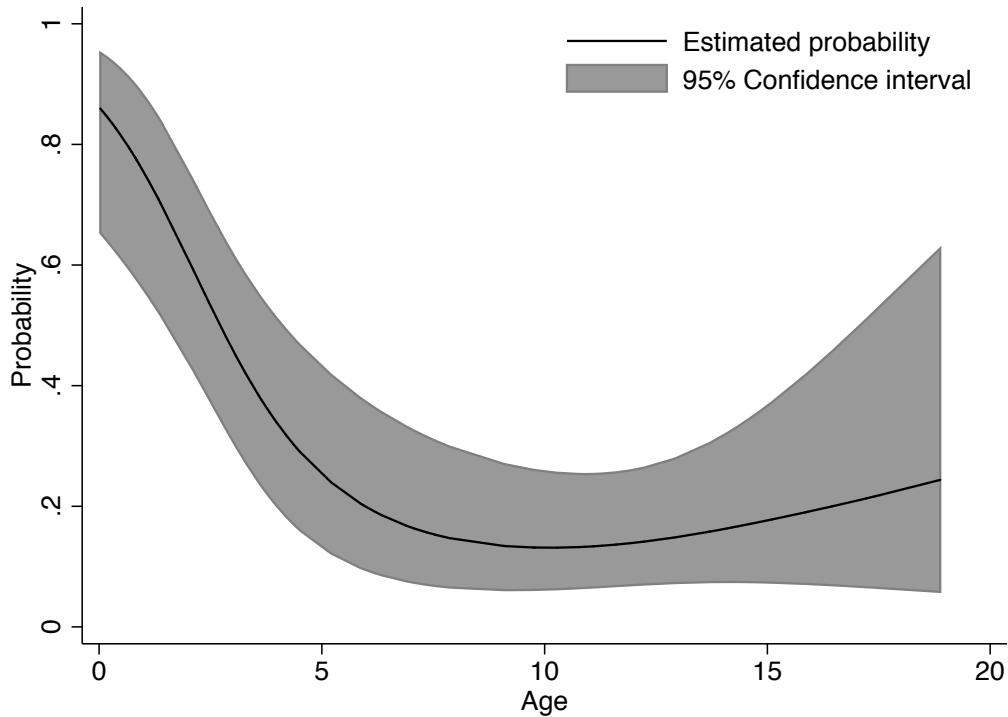

Supplement: NIHMS1551050-supplement-Supplemental_Figure.pdf [file NIHMS1551050-supplement-Supplemental_Figure.pdf]
